# Supplementary material for: A novel strontium-based MOF: synthesis, characterization, and promising application in removal of 152+154Eu from active waste
Source: Royal Society of Chemistry journal article supplement (doi:10.1039/d2ra01159j), 2022-01-01
Supplement: d2ra01159j1.pdf [file d2ra01159j1.pdf]

## Supporting Information

*for*

### **A novel strontium-based MOF: Synthesis, characterization, and promising application for the removal of $^{152+154}\text{Eu}$ radionuclide**

**Mohamed A. Hamouda<sup>a</sup>, Sheta M. Sheta<sup>b,\*</sup>, Reda R. Sheha<sup>c</sup>, AT Kandil<sup>a</sup>, Omnia I. Ali<sup>a</sup>, Said M. El-Sheikh<sup>d</sup>**

<sup>a</sup> *Chemistry Department, Faculty of Science, Helwan University, Cairo, 11795, Egypt.*

<sup>b</sup> *Inorganic Chemistry Department, National Research Centre, 33 El-Behouth St., Dokki, Giza, 12622, Egypt.*

<sup>c</sup> *Nuclear Chem. Dept., Hot Lab Center, Egyptian Atomic Energy Authority, P.O. 13759, Cairo.*

<sup>d</sup> *Nanomaterials and Nanotechnology Department, Central Metallurgical R & D Institute, Cairo, 11421, Egypt.*

**\*Corresponding author**

Sheta, M. Sheta, E-mail: [dr.sheta.nrc@gmail.com](mailto:dr.sheta.nrc@gmail.com), Tel.: +201009697356, Fax: +2-02-33370931.

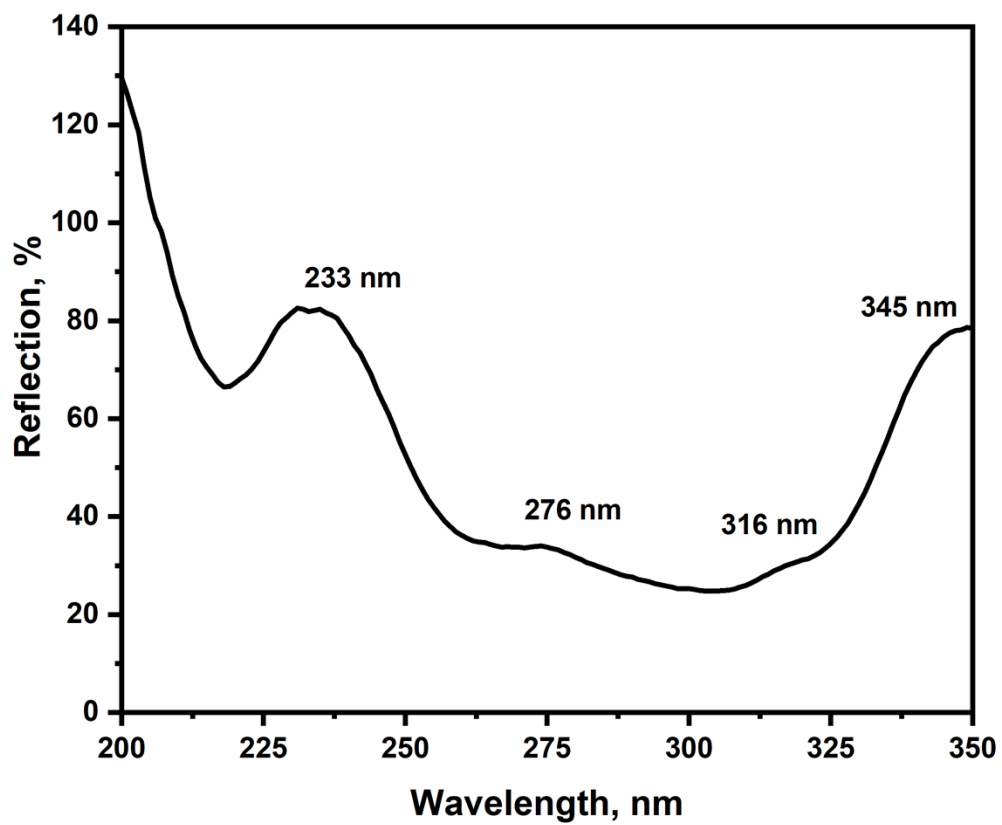

Fig. S1: The electronic-reflection spectrum of the MTSr-MOF.

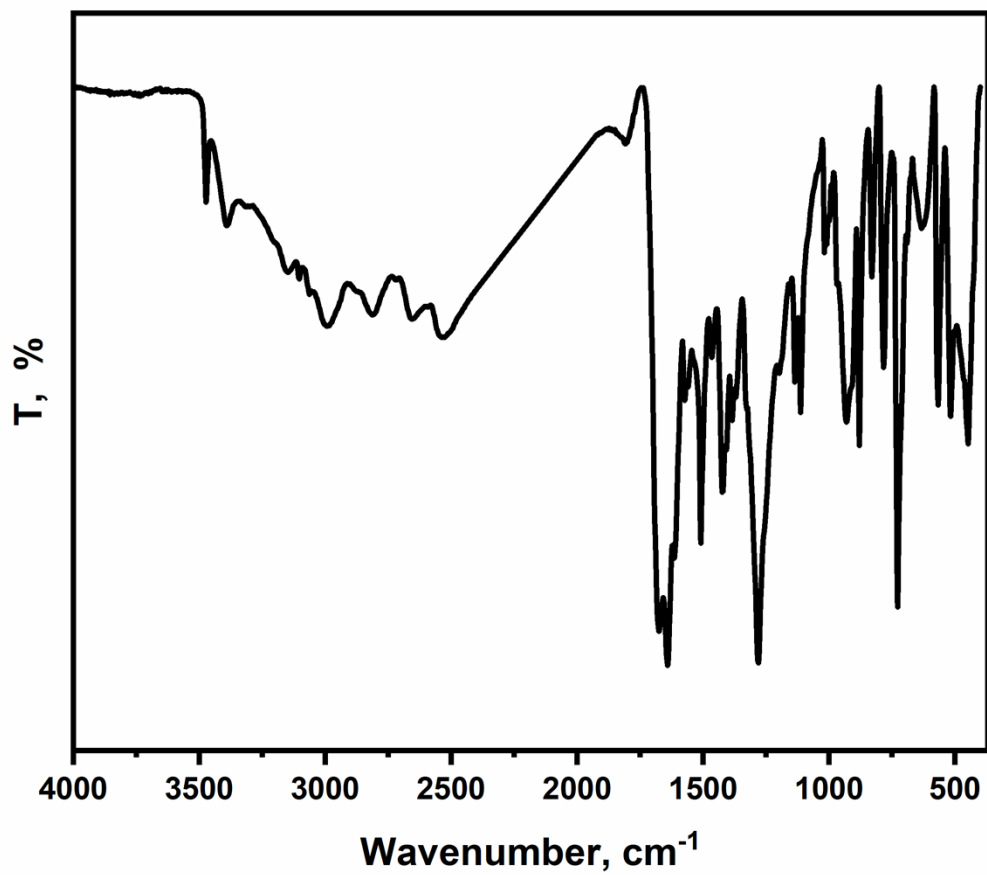

Fig. S2: FT-IR spectrum of the MTSr-MOF.

```
Current Data Parameters
NAME      Mohamed Attia_R_3
EXPNO    10
PROCNO   1

F2 - Acquisition Parameters
Date_    20210330
Time     11.01
INSTRUM  spect
PROBHD   5 mm PABBO BB/
PULPROG  zg30
TD       65536
SOLVENT  DMSO
NS       32
DS       2
SWH      8012.820 Hz
FIDRES   0.122266 Hz
AQ       4.0894465 sec
RG       114.95
DW       62.400 usec
DE       6.50 usec
TE       298.0 K
D1       1.00000000 sec
TDO      1

----- CHANNEL f1 -----
SFO1     400.1924713 MHz
NUC1     1H
P1       15.00 usec
P1M1    10.3999962 W

F2 - Processing parameters
SI       65536
SF       400.1900000 MHz
WDW      EM
SSB      0
LB       0.30 Hz
GB       0
PC       1.00
```

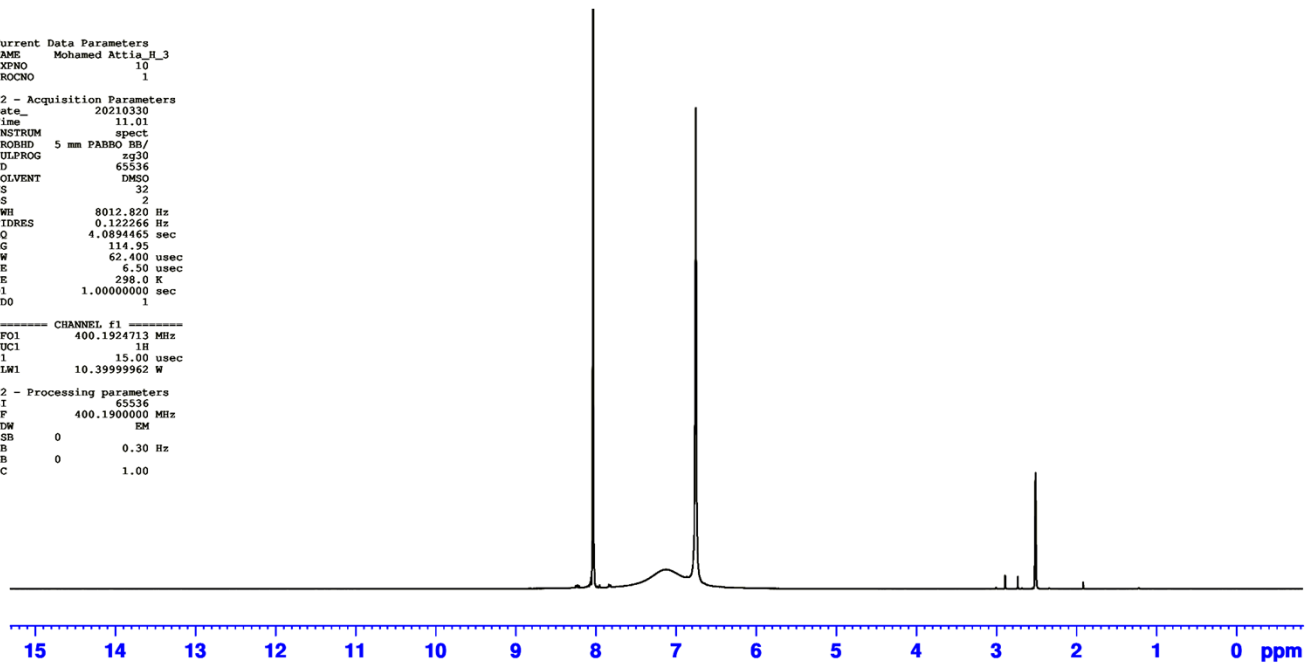

**Fig. S3:** <sup>1</sup>H-NMR spectrum of the MTSr-MOF.

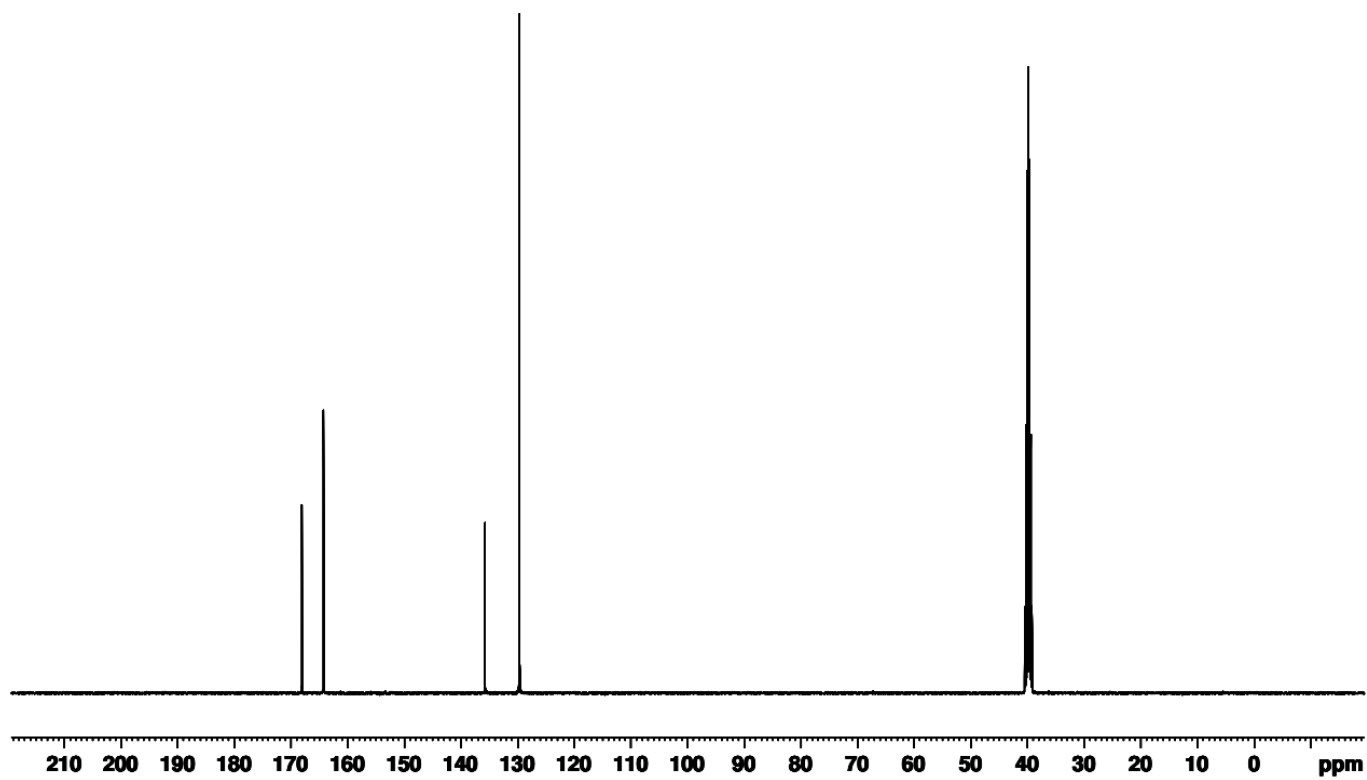

Fig. S4:  $^{13}\text{C}$ -NMR spectrum of the MTSr-MOF.

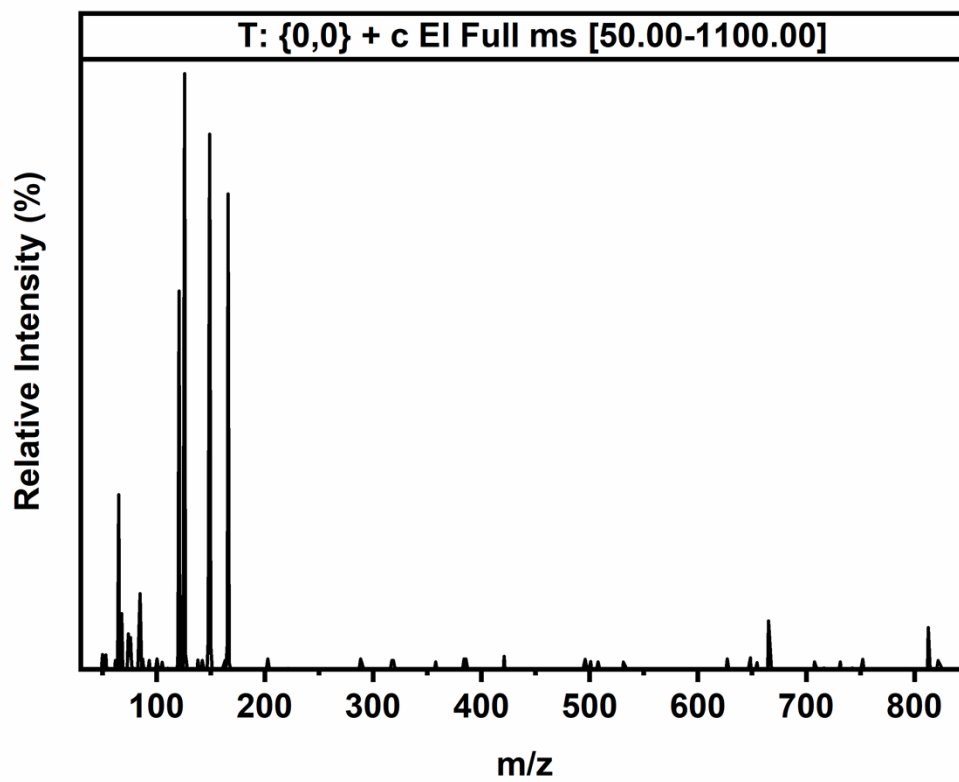

Fig. S5: Mass spectrum of the MTSr-MOF.

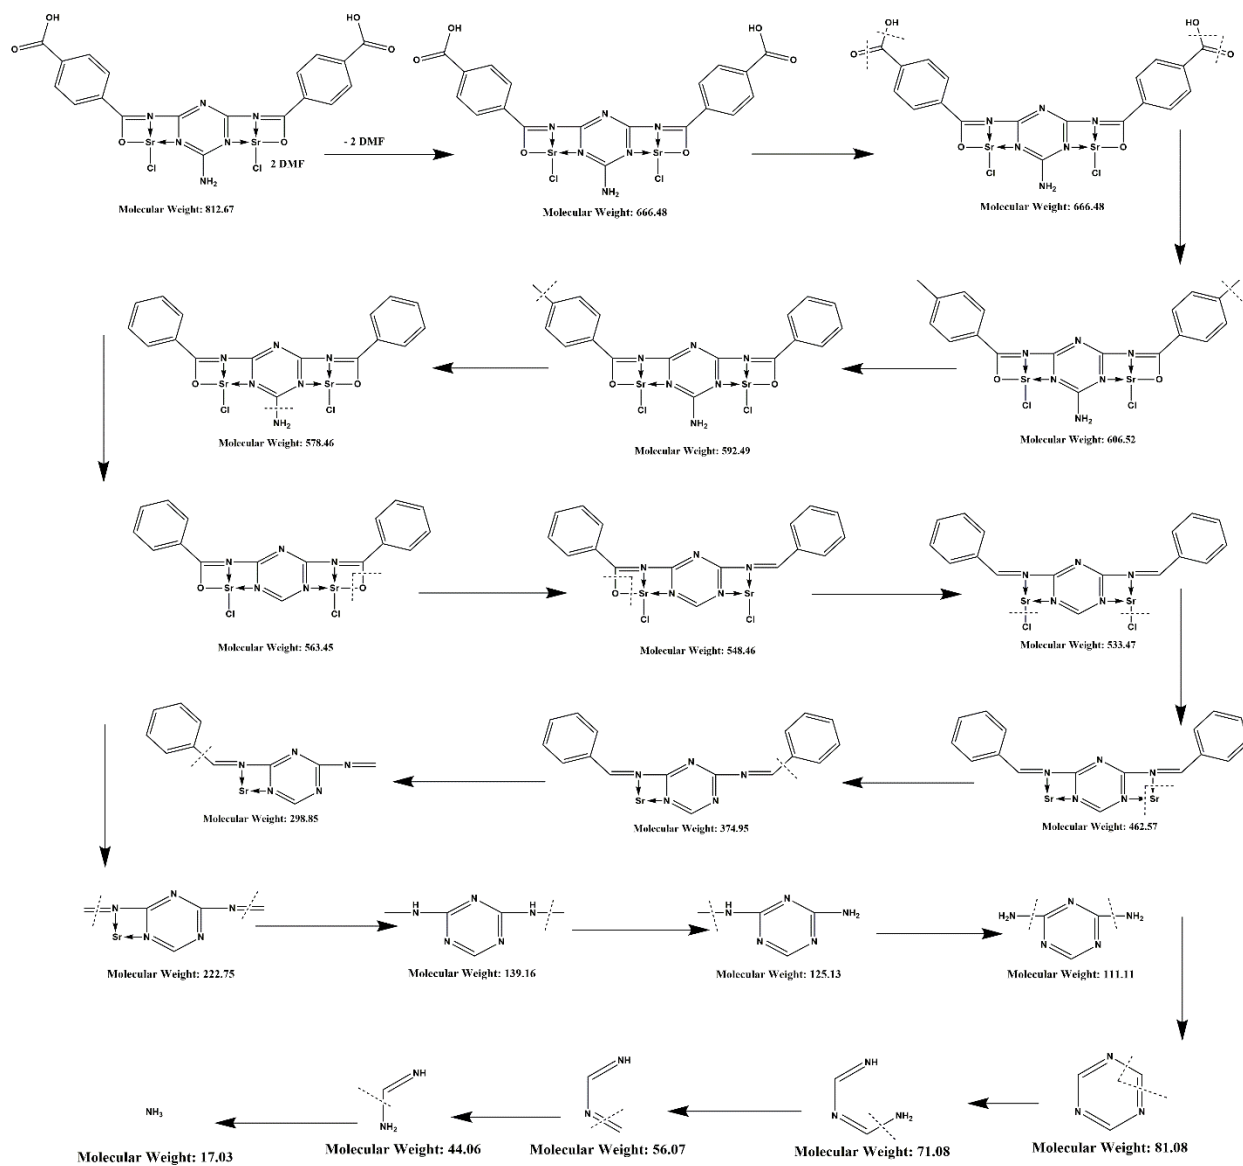

**Fig. S6:** The proposed fragmentation scheme of the MTSr-MOF.

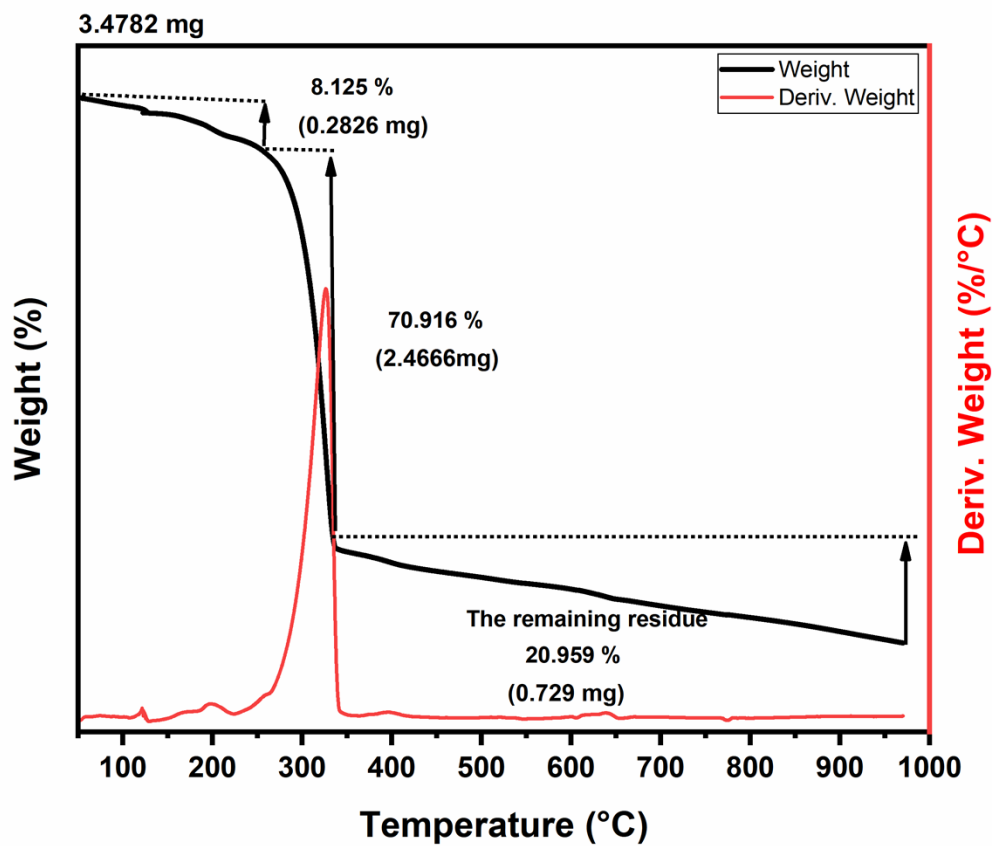

Fig. S7: The thermogravimetric analysis (TGA-DTA) of the MTSr-MOF.



**Table S1.** Theoretically calculated, found elemental analysis, and EDX analysis of MTSr-MOF.

| Element | Theoretically calculated | Found CHN elemental analysis | Found EDX analysis |          |          |         |
|---------|--------------------------|------------------------------|--------------------|----------|----------|---------|
|         |                          |                              | Weight %           | Atomic % | Net Int. | Error % |
| C       | 36.95                    | 37.61                        | 36.66              | 51.62    | 10.50    | 0.05    |
| H       | 3.22                     | 2.94                         | ---                | ---      | ---      | ---     |
| N       | 13.79                    | 13.69                        | 12.87              | 14.51    | 0.5      | 0.29    |
| O       | 15.75                    | ---                          | 21.19              | 25.89    | 17.06    | 0.04    |
| Sr      | 21.56                    | ---                          | 20.93              | 4.04     | 40.8     | 0.04    |
| Cl      | 8.72                     | ---                          | 8.35               | 3.94     | 5.20     | 0.16    |

**Table S2.** Various surface area of MTSr-MOF.

| <b>Surface Area methods</b>        | <b>MTSr-MOF</b>           |
|------------------------------------|---------------------------|
| <u>BET method</u>                  |                           |
| Single point BET                   | 178.228 m <sup>2</sup> /g |
| Multi-point BET                    | 74.0211 m <sup>2</sup> /g |
| Langmuir method                    | 1652.22 m <sup>2</sup> /g |
| <u>BJH method</u>                  |                           |
| BJH adsorption                     | 179.541 m <sup>2</sup> /g |
| BJH desorption                     | 181.294 m <sup>2</sup> /g |
| <u>DH method</u>                   |                           |
| DH adsorption                      | 185.003 m <sup>2</sup> /g |
| DH desorption                      | 186.755 m <sup>2</sup> /g |
| V-t method external surface area   | 74.0211 m <sup>2</sup> /g |
| DR method micropore surface area   | 789.809 m <sup>2</sup> /g |
| DFT method cumulative surface area | 272.903 m <sup>2</sup> /g |

**Table S3.** The pore radius values of MTSr-MOF determined using different methods.

| <b>Pore Size methods</b>      | <b>MTSr-MOF</b> |
|-------------------------------|-----------------|
| <u>BJH methods</u>            |                 |
| BJH adsorption pore radius    | 1.76371 nm      |
| BJH desorption pore radius    | 1.78412 nm      |
| <u>DH methods</u>             |                 |
| DH adsorption pore radius     | 1.76371 nm      |
| DH desorption pore radius     | 1.78412 nm      |
| DR method micropore radius    | 2.55902 nm      |
| DFT method pore radius (mode) | 2.364 nm        |

**Table S4.** The Pore volume values of MTSr-MOF determined using different methods.

| <b>Pore Volume methods</b>                 | <b>MTSr-MOF</b> |
|--------------------------------------------|-----------------|
| <u>BJH methods</u>                         |                 |
| BJH adsorption cumulative micropore volume | 0.298405 cc/g   |
| BJH desorption cumulative micropore volume | 0.298361 cc/g   |
| <u>DH methods</u>                          |                 |
| DH adsorption cumulative micropore volume  | 0.293931 cc/g   |
| DH desorption cumulative micropore volume  | 0.293886 cc/g   |
| DR method micropore volume                 | 0.28138 cc/g    |
| DFT method cumulative pore volume          | 0.402972 cc/g   |
